# Supplementary material for: Functional repertoire of EV-associated miRNA profiles after lipoprotein depletion via ultracentrifugation and size exclusion chromatography from autologous blood products
Source: PubMed Central journal article supplement (PMC7955123; doi:10.1038/s41598-021-84234-5), 2021-03-12

# Functional repertoire of EV-associated miRNA profiles after lipoprotein depletion via ultracentrifugation and size exclusion chromatography from autologous blood products

Alexander Otahal<sup>1</sup>, Olga Kuten-Pella<sup>2</sup>, Karina Kramer<sup>1</sup>, Markus Neubauer<sup>1</sup>, Zsombor Lacza<sup>3</sup>, Stefan Nehrer<sup>1</sup>, Andrea de Luna<sup>1\*</sup>

<sup>1</sup> Center for Regenerative Medicine, Department for Health Sciences, Medicine and Research, Danube University Krems, Krems an der Donau, Austria

<sup>2</sup> OrthoSera GmbH, Krems an der Donau, Austria

<sup>3</sup> Department of Sports Physiology, University of Physical Education, Budapest, Hungary

\* Corresponding author

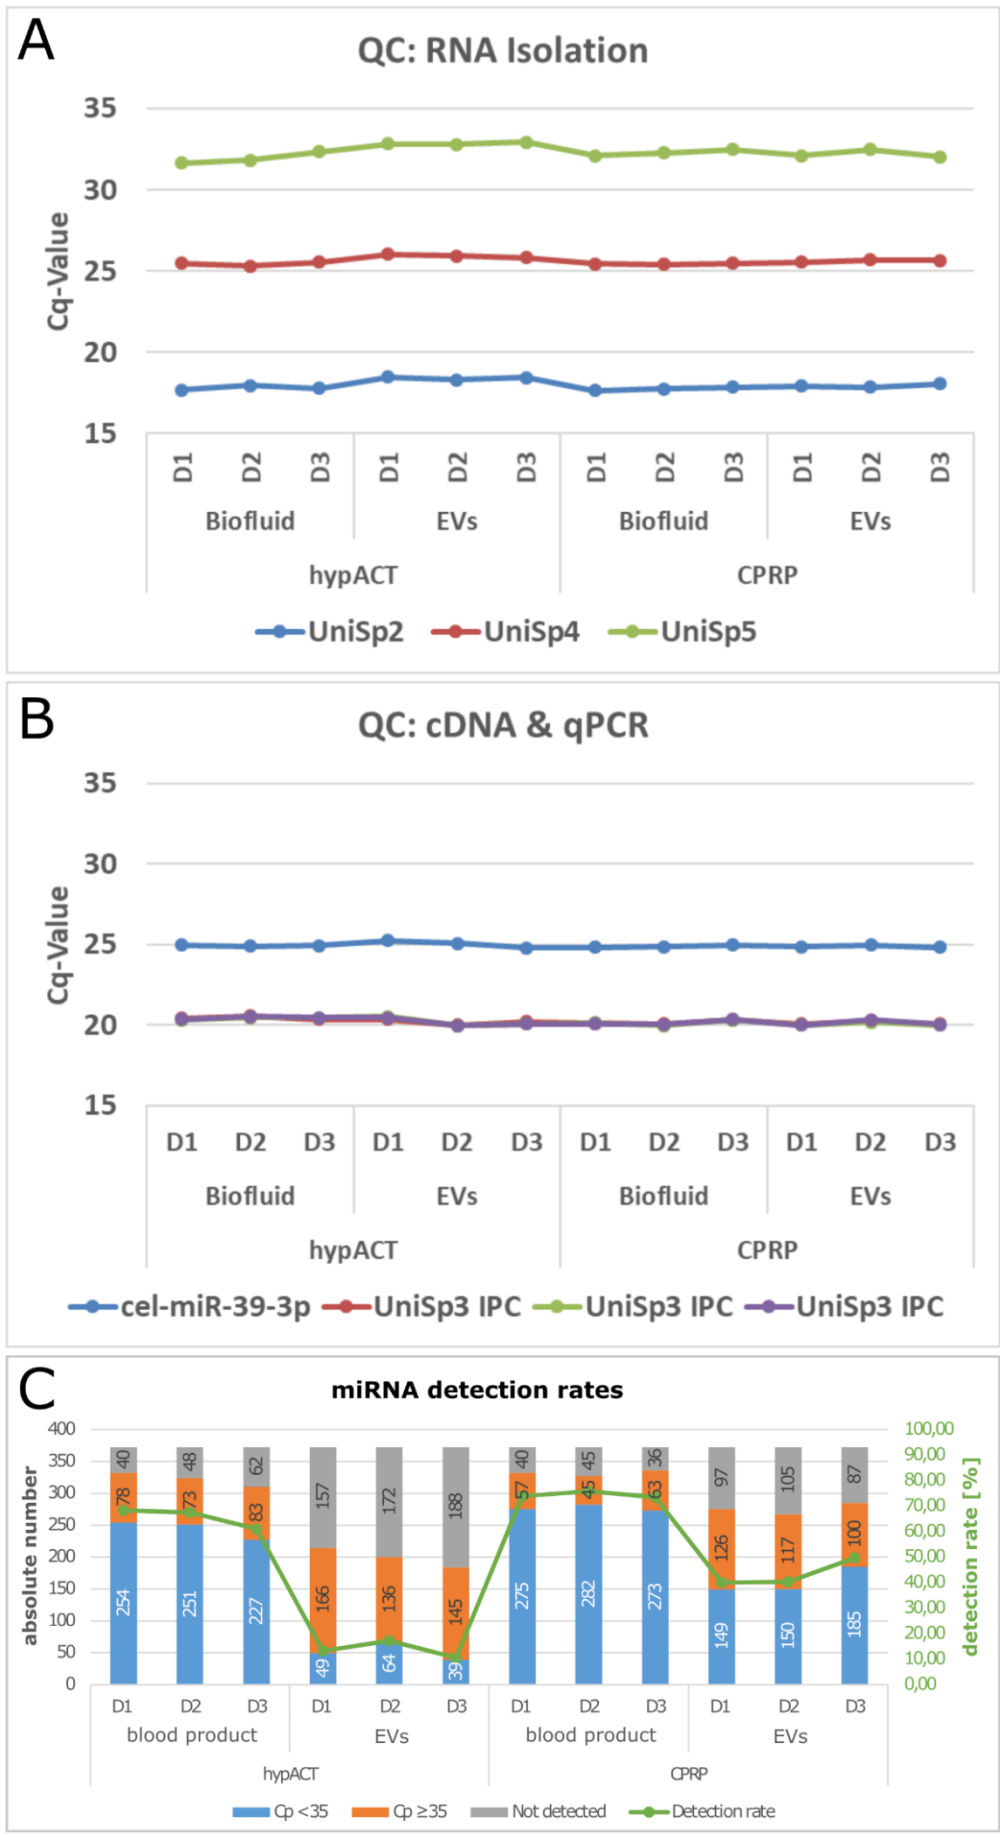

Fig S1. Quality control of RT-qPCR-based miRNA quantification and miRNA detection rates (A) RNA extraction controls, (B) reverse transcription controls. (C) Number of miRNA species identified per sample.

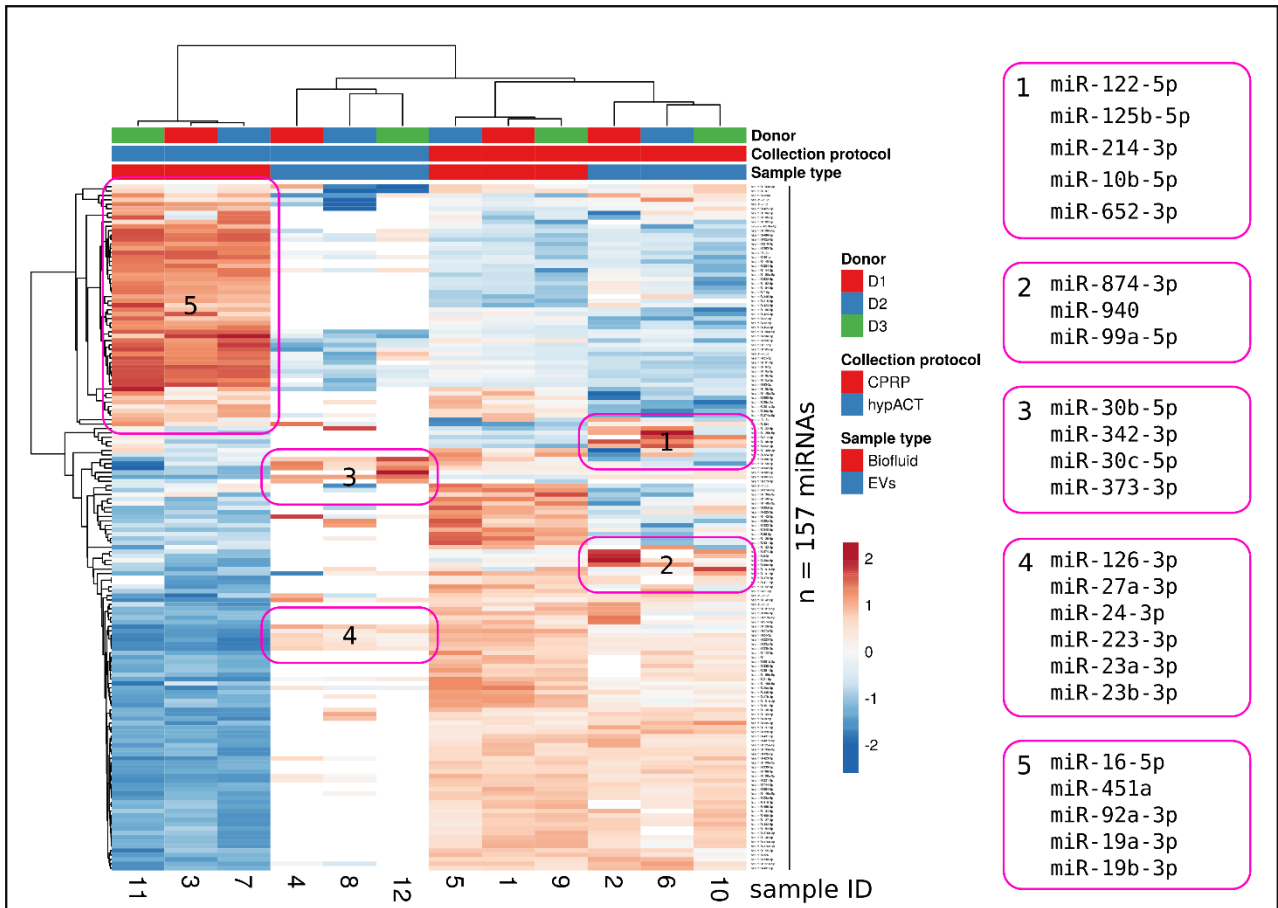

Fig S2. Heat map of  $\Delta C_p$  values, normalised to let-7a. Hierarchical clustering analysis was performed via ClustVis<sup>75</sup> using the default settings, i.e. singular value decomposition with imputation, pearson correlation as the distance metric, and average distance for clustering.

## Supplementary data 1 – PHP implementation of Savitzky-Golay algorithm

```
/*
 *
 * Perform size distribution smooting using the Savitzky-Golay polynomial approach
 *
 * @ref statistics4u.info/fundstat_eng/cc_filter_savgolay.html
 * @ref statistics4u.info/fundstat_germ/cc_savgol_coeff.html
 *
 * @param array $a - size distribution as list of concentrations
 * @ $neighbours int $neighbours - chosen number of neighbours of target value
 *
 * @return array $smoothed_a - smoothed size distribution
 */
function savitzky_golay_smooth ($a,$neighbours) {

    $neighbours = intval($neighbours);

    if ( is_numeric($neighbours) && $neighbours > 1 && $neighbours < 13 ) {

        //backup
        $smoothed_a = $a;
        //list of coefficients indexed by neighbour parameter
        //np is the number of values used for smoothing
        $coefficients = array(
            2 => array(-3,12,17,12,-3), //np=5
            3 => array(-2,3,6,7,6,3,-2), //np=7
            4 => array(-21,14,39,54,59,54,39,14,21), //np=9
            5 => array(-36,9,44,69,84,89,84,69,44,9,-36), //np=11
            6 => array(-11,0,9,16,21,24,25,24,21,16,9,0,-11), //np=13
            7 => array(-78,-13,42,87,122,147,162,167,162,147,122,87,42,-13,-78), //np=15
            8 => array(-21,-6,7,18,27,34,39,42,43,42,39,34,27,18,7,-6,-21), //np=17
            9 => array(-136,-51,24,89,144,189,224,249,264,269,264,249,224,189,144,89,24,-51,-136), //np=19
            10 => array(-171,-76,9,84,149,204,249,284,309,324,329,324,309,284,249,204,149,84,9,-76,-171), //np=21
            11 => array(-42,-21,-2,15,30,43,54,63,70,75,78,79,78,75,70,63,54,43,30,15,-2,-21,-42), //np=23
            12 => array(-253,-138,-33,62,147,222,287,343,387,422,447,462,467,462,447,422,387,343,287,222,147,62,-33,-138,-253) //np=25
        );
        //list of normalisation factors indexed by neighbour parameter
        $h = array(
            2 => 35,
            3 => 21,
            4 => 231,
            5 => 429,
            6 => 143,
            7 => 1105,
            8 => 323,
            9 => 2261,
            10 => 3059,
            11 => 805,
            12 => 5175
        );

        //define position range
        $positions = range(-$neighbours,$neighbours);

        //perform smoothing
        for ($i=$neighbours;$i<count($a)-$neighbours;$i++) {
            //calculate
            for ($y=0,$j=0;$j<count($coefficients[$neighbours]);$j++) {
                $y += $coefficients[$neighbours][$j]*$a[$i+$positions[$j]];
            }
            //normalize
            $y = $y/$h[$neighbours];
            //set negation value to 0, as there can't be negative particle concentration
            if ( $y < 0 ) {
                $smoothed_a[$i] = 0;
            } else {
                $smoothed_a[$i] = $y;
            }
        }
        } else {
            die("Wrong neighbours parameter for Savitzky-Golay smoothing");
        }
        return $smoothed_a;
    }
}
```

## Supplementary data 2 – Full Western Blot scans

### Blots in Fig 3A

ApoA1, 10  $\mu\text{g}$  per lane, except PL (20  $\mu\text{g}$ )  
10% Bis/Tris SDS-PAGE, non-reducing

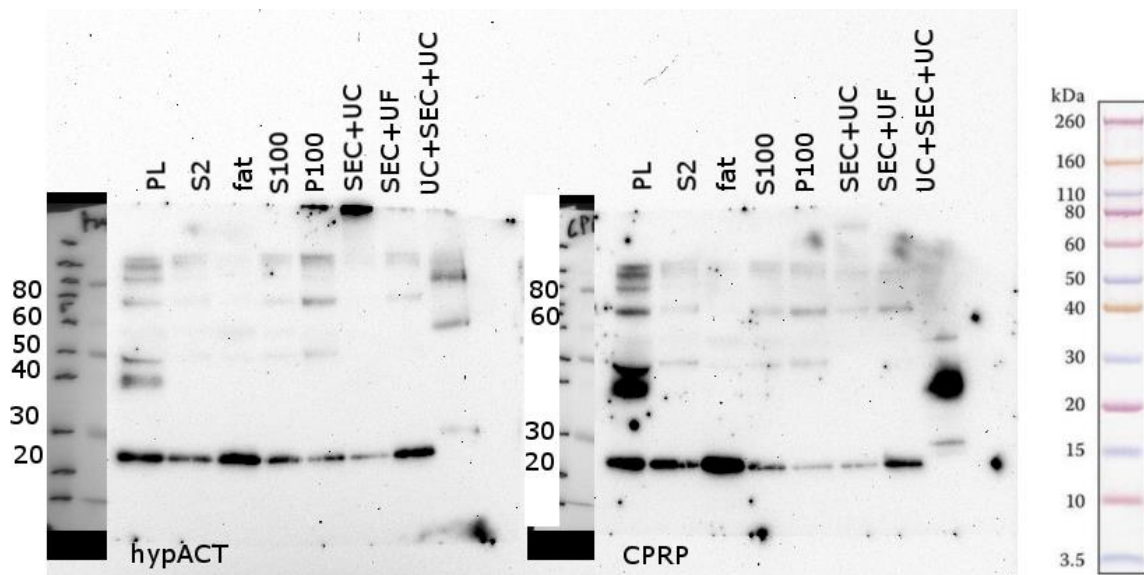

CD9, 10  $\mu\text{g}$  per lane, except PL (20  $\mu\text{g}$ )  
10% Bis/Tris SDS-PAGE, non-reducing

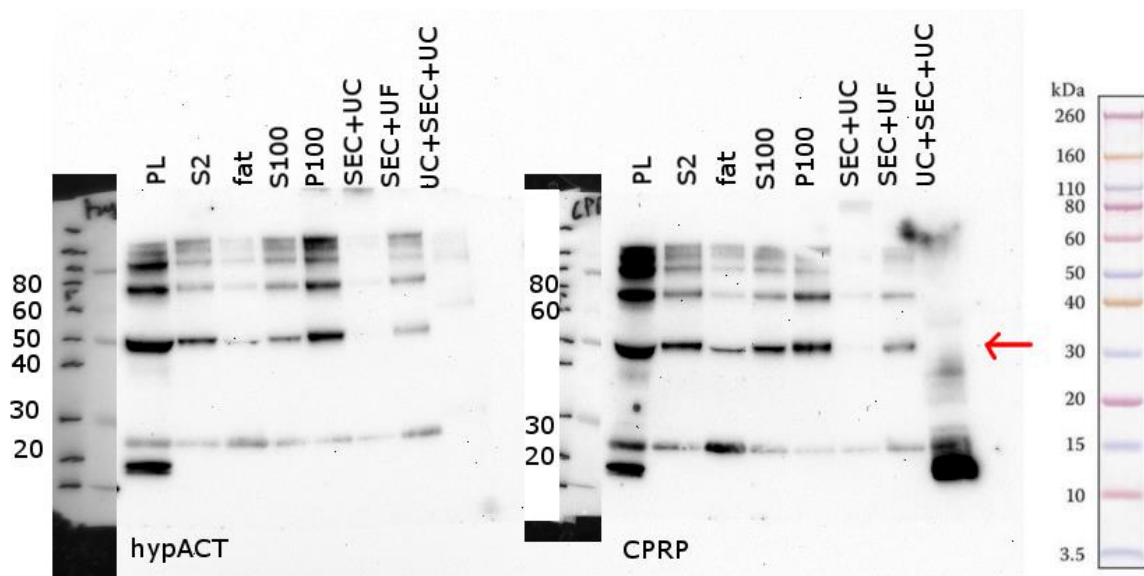

Alix, 10  $\mu\text{g}$  per lane, except PL (20  $\mu\text{g}$ )  
4-12% Bis/Tris SDS-PAGE, reducing

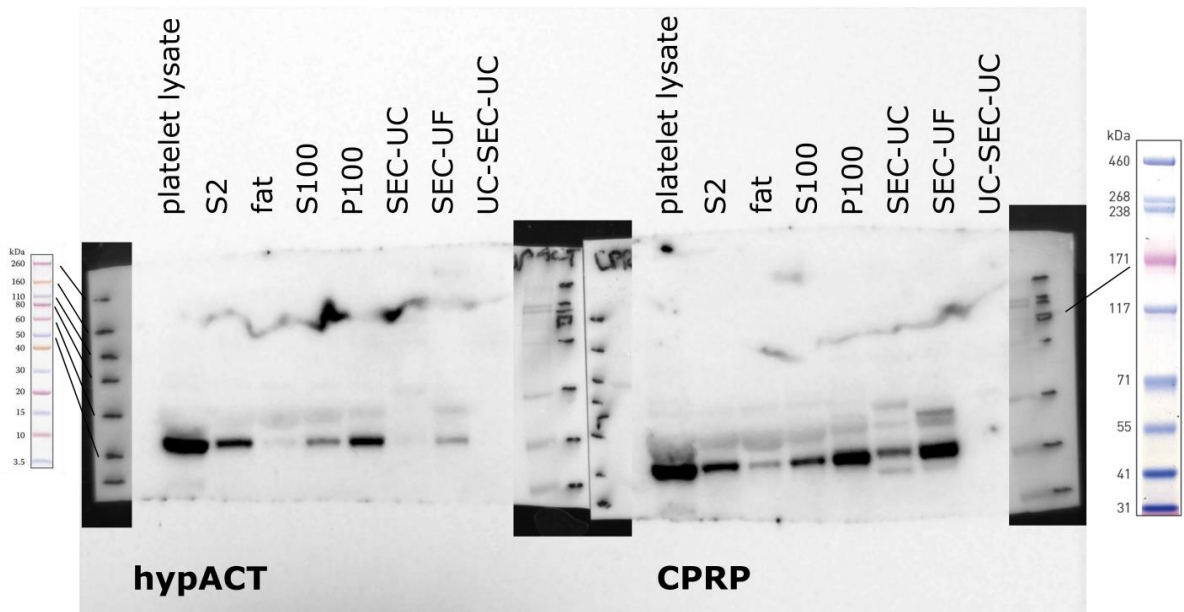

ApoB100, 10  $\mu\text{g}$  per lane, except PL (20  $\mu\text{g}$ )  
4-12% Bis/Tris SDS-PAGE, reducing

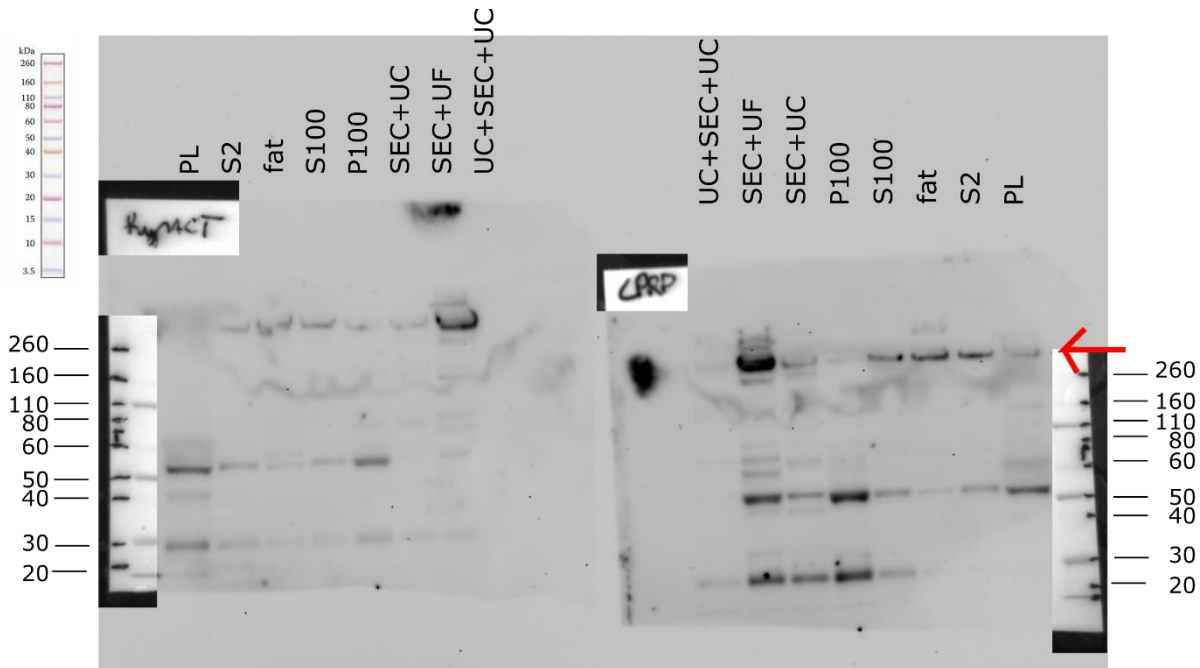

## Blots in Fig 3B

CD63, 80  $\mu$ g per lane, except PL (20  $\mu$ g)  
 10% Bis/Tris SDS-PAGE, non-reducing

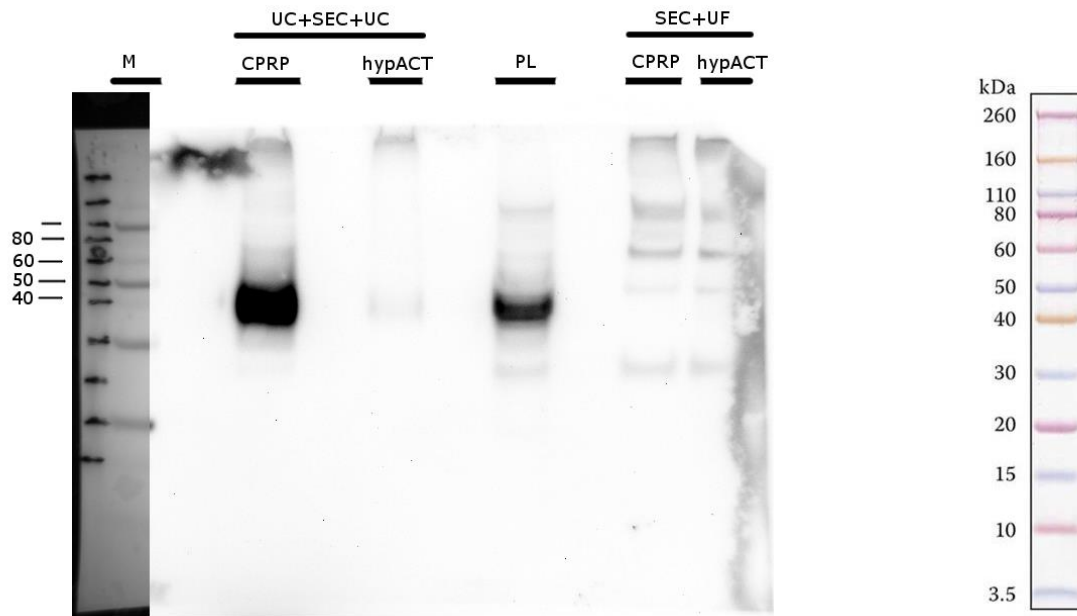

CD9, 80  $\mu$ g per lane, except PL (20  $\mu$ g); reprobed after detecting CD63 and washing  
 10% Bis/Tris SDS-PAGE, non-reducing

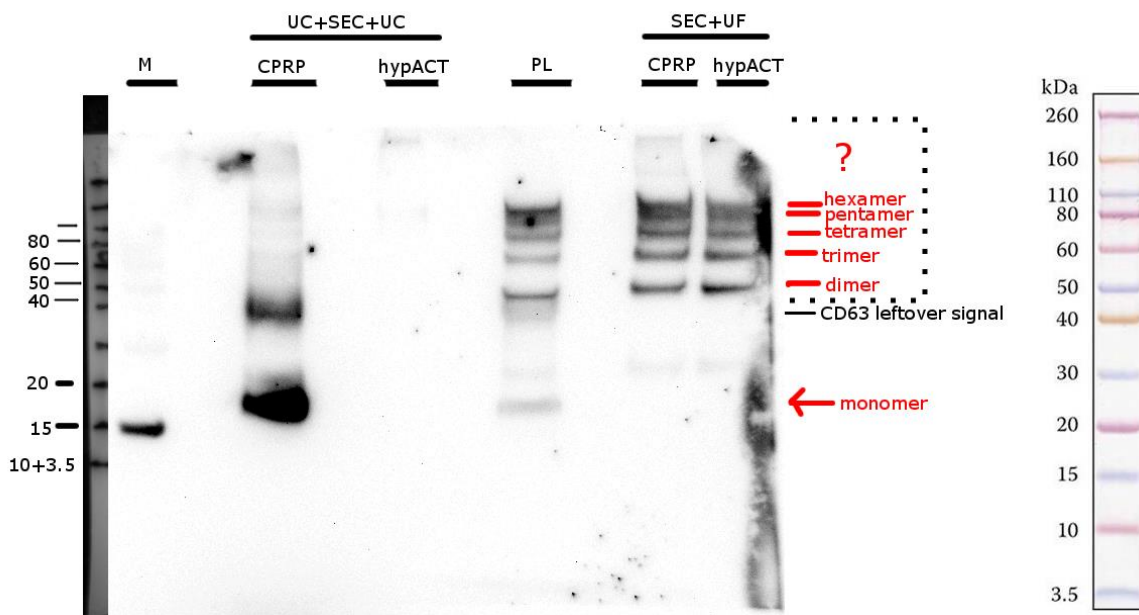

Supplement: 41598_2021_84234_MOESM1_ESM.pdf [file 41598_2021_84234_MOESM1_ESM.pdf]
